# Supplementary material for: Mesoporous Silica-Bioglass Composite Pellets as Bone Drug Delivery System with Mineralization Potential
Source: MDPI journal article supplement (doi:10.3390/ijms22094708), 2021-04-29
Supplement: s1 [file s1]

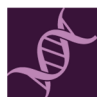

Article

# Mesoporous silica-bioglass composite pellets as bone drug delivery system with mineralization potential

Adrian Szewczyk <sup>1</sup>, Adrianna Skwira <sup>1</sup>, Agnieszka Konopacka <sup>2</sup>, Rafał Sądej <sup>3</sup> and Magdalena Prokopowicz <sup>1,\*</sup>

<sup>1</sup> Department of Physical Chemistry, Faculty of Pharmacy, Medical University of Gdańsk, Hallera 107, 80-416 Gdańsk, Poland; adrian.szewczyk@gumed.edu.pl; adrianna.skwira@gumed.edu.pl

<sup>2</sup> Department of Pharmaceutical Microbiology, Faculty of Pharmacy, Medical University of Gdańsk, Hallera 107, 80-416 Gdańsk, Poland; agnieszka.konopacka@gumed.edu.pl

<sup>3</sup> Department of Molecular Enzymology and Oncology, Intercollegiate Faculty of Biotechnology, University of Gdańsk and Medical University of Gdańsk, Dębinki 1, 80-211 Gdańsk, Poland; rafal.sadej@gumed.edu.pl

\* Correspondence: magdalena.prokopowicz@gumed.edu.pl

## Supplementary material

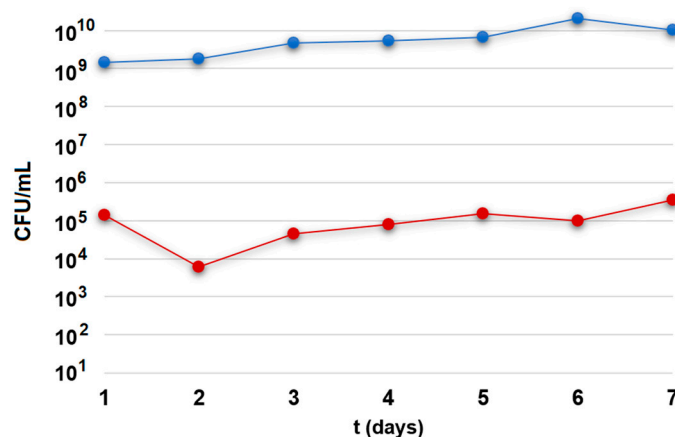

**Figure S1.** The obtained CFU/mL value as a function of time for both bacterial culture media: incubated with pellets (red) and control (blue).
